# Supplementary material for: The construction of a heterostructured RGO/g-C3N4/LaCO3OH composite with enhanced visible light photocatalytic activity for MO degradation
Source: Royal Society of Chemistry journal article supplement (doi:10.1039/d3ra02415f), 2023-01-01
Supplement: d3ra02415f1.pdf [file d3ra02415f1.pdf]

## **The construction of heterostructured RGO/g-C<sub>3</sub>N<sub>4</sub>/LaCO<sub>3</sub>OH composite with enhanced visible light photocatalytic activity for MO degradation**

Deng Gu,<sup>a,b</sup> Yuanjin Wang,<sup>a</sup> Zhiman Liang,<sup>a</sup> Yanting Dou,<sup>a</sup> Zhenhe Xu,<sup>\*a</sup> Jiqi Zheng,<sup>\*a</sup> Yaguang Sun,<sup>b</sup> Fu Ding<sup>\*b</sup> and Yu Gao<sup>\*a</sup>

<sup>a</sup>College of Environmental and Chemical Engineering, Dalian University, Dalian 116622, China.

<sup>b</sup>Key Laboratory of Inorganic Molecule-Based Chemistry of Liaoning Province, Shenyang University of Chemical Technology, Shenyang, 110142, China.

\*Correspondence: xuzh@syuct.edu.cn (Z. Xu); jiqizheng@yeah.net (J. Zheng); dingfu@syuct.edu.cn (F. Ding); gaoy777@126.com (Y. Gao)

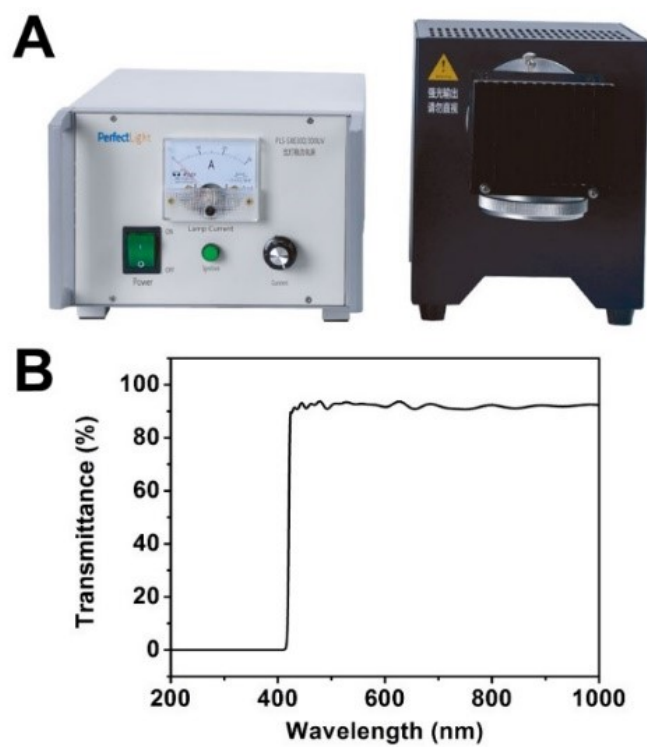

**Figure S1.** (A) The photograph of the 300 W xenon lamp (PLS-SXE 300, Beijing Perfect Light Co., Ltd.) and (B) the transmission spectrum of the filtered light.

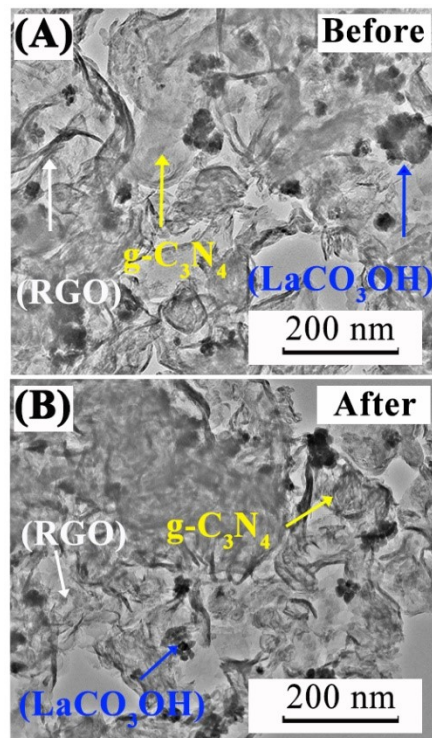

**Figure S2.** TEM images of RGO/g-C<sub>3</sub>N<sub>4</sub>/LaCO<sub>3</sub>OH before (A) and after (B) the cycling test.
